# Supplementary material for: Immobilization of TiO2 Nanoparticles in Hydrogels Based on Poly(methyl acrylate) and Succinamide Acid for the Photodegradation of Organic Dyes
Source: MDPI journal article supplement (doi:10.3390/catal11050613), 2021-05-11
Supplement: s1 [file s1]

Archive with 1 entries (1 files):
- catalysts-1192752-SI.pdf
