# Supplementary material for: Immobilization of TiO2 Nanoparticles in Hydrogels Based on Poly(methyl acrylate) and Succinamide Acid for the Photodegradation of Organic Dyes
Source: MDPI journal article supplement (doi:10.3390/catal11050613), 2021-05-11
Supplement: s1 [file s1 › catalysts-1192752-SI.pdf]

*Supplementary Materials*

# Immobilization of TiO<sub>2</sub> Nanoparticles in Hydrogels Based on Poly(methyl acrylate) and Succinamide Acid for the Photodegradation of Organic Dyes

Xiaomeng You <sup>†</sup>, Hailong Huang <sup>†</sup>, Ran Zhang, Zhongli Yang, Min Xu <sup>\*</sup>, Xue Lu Wang <sup>\*</sup> and Ye-Feng Yao <sup>\*</sup>

Physics Department & Shanghai Key Laboratory of Magnetic Resonance, School of Physics and Electronic Science, East China Normal University, North Zhongshan Road 3663, Shanghai 200062, China; yxmmusian@outlook.com (X.Y.); huanghailong@sinap.ac.cn (H.H.); zhangran@whu.edu.cn (R.Z.); ZhongliYang2021@outlook.com (Z.Y.)

<sup>\*</sup> Correspondence: xumin@phy.ecnu.edu.cn (M.X.); xlwang@phy.ecnu.edu.cn (X.L.W.); yfyao@phy.ecnu.edu.cn (Y.-F.Y.)

<sup>†</sup> These authors contributed equally.

## 1. Experimental sections

### 1.1. Photocatalytic H<sub>2</sub> production test

The photocatalytic H<sub>2</sub> production experiments of the TiO<sub>2</sub>, PMA-TiO<sub>2</sub>, and SAA-TiO<sub>2</sub> samples were conducted using a photocatalytic system (Labsolar-IIIAG, PerfectLight, Shanghai, China). During the reaction, powder TiO<sub>2</sub> or bulk hydrogel-TiO<sub>2</sub> was immersed in 90 ml deionized water, and 10 ml triethanolamine (TEOA) was added as the sacrificial reagent. The suspension was illuminated under vacuum condition, and the H<sub>2</sub> signal was collected half an hour by a gas chromatography (GC2060, Ruimin). The experiment was carried out under magnetic stirring when powder TiO<sub>2</sub> was used. Considering the hydrogel-TiO<sub>2</sub> is lumpy, the magnetic stirring was not employed. A 300 W xenon lamp (PerfectLight, Beijing, China) was used as the light source. The optical power density was measured as 0.8 W/cm<sup>2</sup>, using an optical power meter (PLMW2000, PerfectLight, Shanghai, China).

### 1.2. Photocatalytic degradation test

The photodegradation performance of TiO<sub>2</sub>, PMA-TiO<sub>2</sub>, and SAA-TiO<sub>2</sub> samples were evaluated by eliminating methyl orange, methylene blue, rhodamine B, and bright green at a concentration of 20 mg/L. During the test, the bulk hydrogel-TiO<sub>2</sub> was placed in 20 mL organic dye aqueous solution. The mixture was left for 30 min in the dark to obtain absorption-desorption equilibrium. At 15 min intervals, 4 mL of the solution was sampled to measure the absorbance. For comparison, the powder TiO<sub>2</sub> was also used to test the performance when degrading organic dyes. The conditions were the same, but the experiment was carried out under magnetic stirring. Besides, a disposable syringe filter (PTFE, 0.22 µm) was used to remove the solid particle and obtain a clear liquid when sampling. The changes in absorbance of the solution were analyzed on a UV-Vis spectrophotometer (UV-2700, Shimadzu, Shanghai, China) by recording the absorption spectrum in the wavelength range of 200–500 nm. The optical power density was measured as 0.8 W/cm<sup>2</sup>, using an optical power meter (PLMW2000, PerfectLight, Beijing, China).

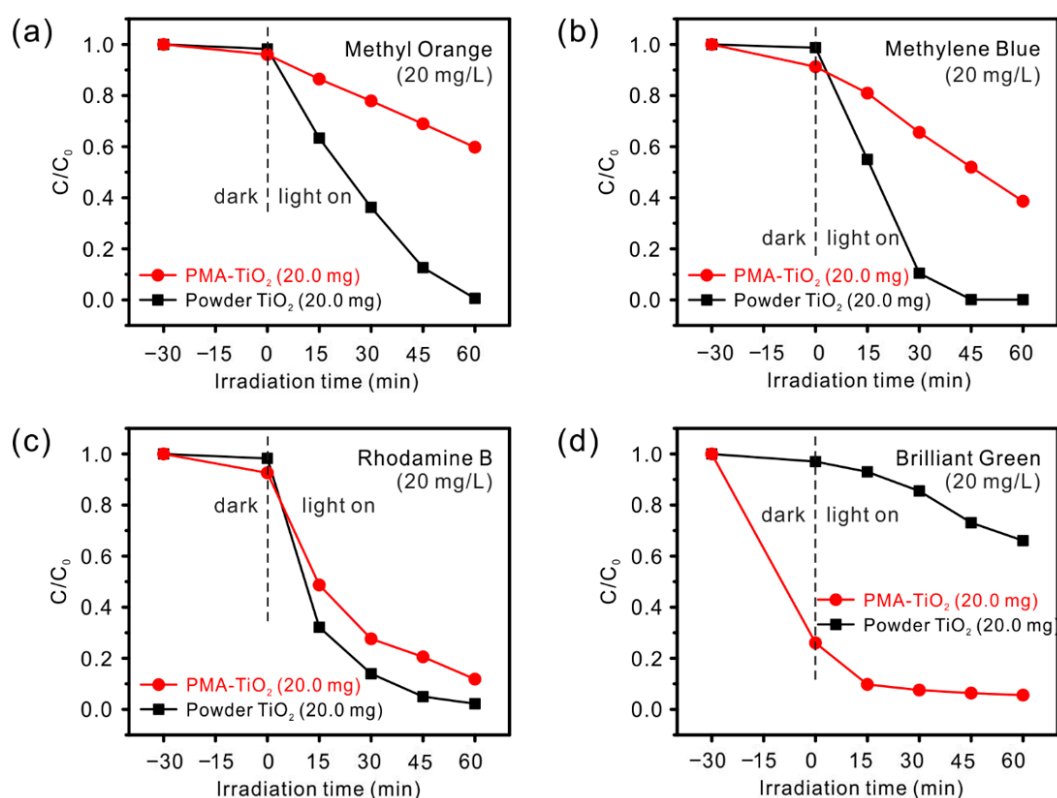

**Figure S1.** Photodegradation efficiency of (a) methyl orange; (b) methylene blue; (c) Rhodamine B; and (d) bright green by powdery TiO<sub>2</sub> and PMA-TiO<sub>2</sub> (20.0 mg) hydrogel, respectively.  $C_0$  represents the initial concentration of the organic dyes, and  $C$  represents the real-time concentration.

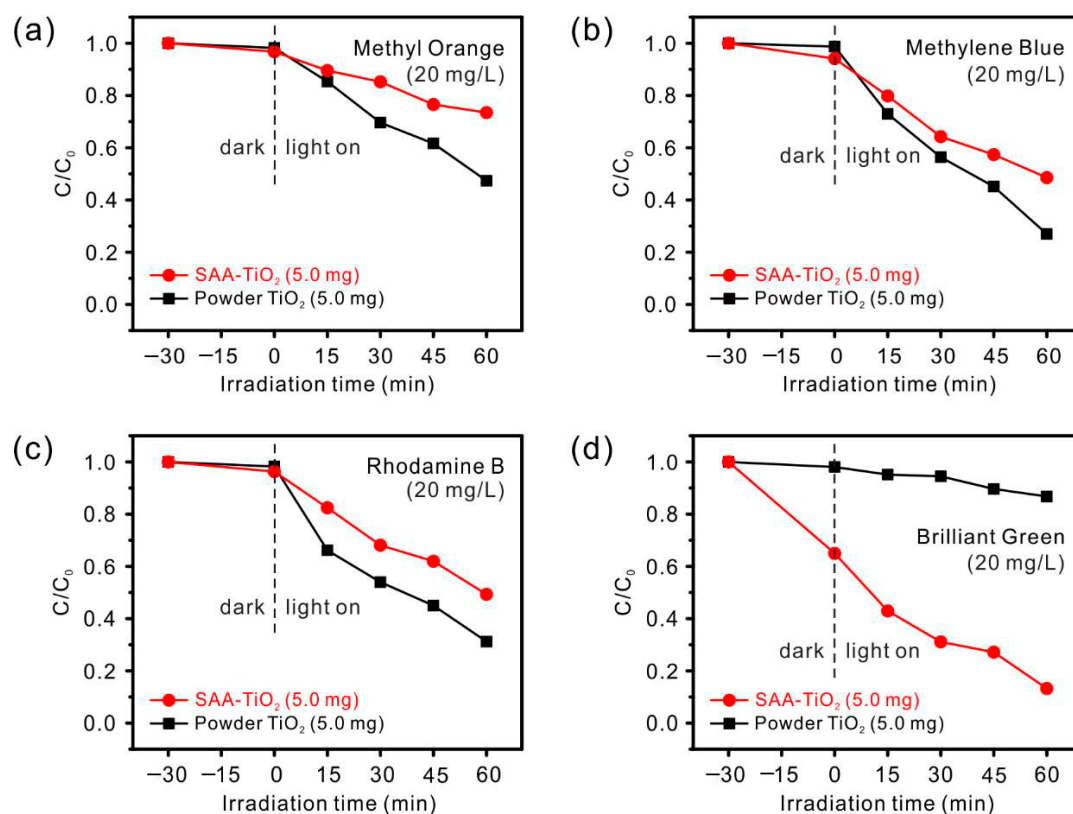

**Figure S2.** Photodegradation efficiency of (a) methyl orange; (b) methylene blue; (c) Rhodamine B; and (d) bright green by powdery TiO<sub>2</sub> and SAA-TiO<sub>2</sub> (5.0 mg) hydrogel, respectively.  $C_0$  represents the initial concentration of the organic dyes, and  $C$  represents the real-time concentration.

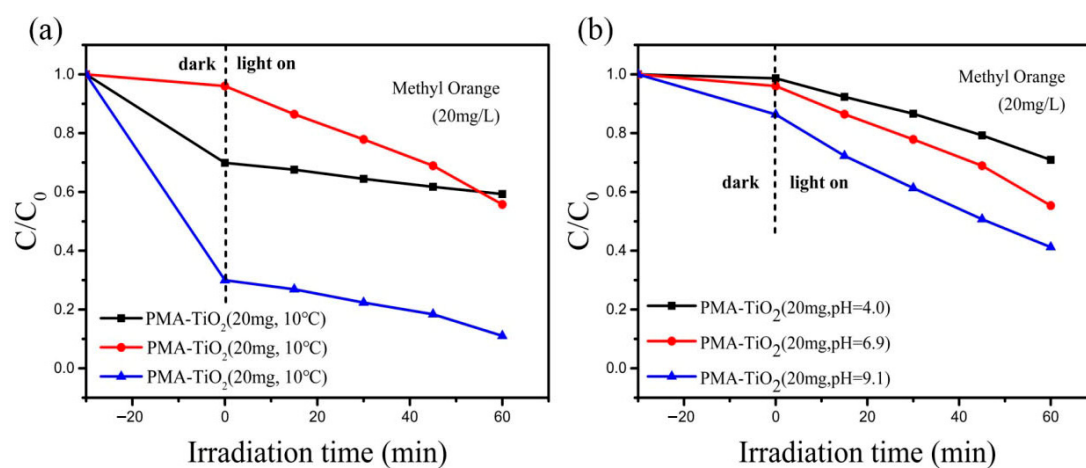

**Figure S3.** Catalytic performance of PMA-TiO<sub>2</sub> at (a) different temperatures and (b) different pH.
